# Supplementary material
Source: publisher site journal article supplement (https://www.dovepress.com/article/316048)
Supplement: Supplementary file 1 [file get_supplementary_file.php]

**Appendix A**. Spanish version of Classroom Engagement Inventory

This scale was validated in Spanish:

En esta clase... (In this class…)

1. Me intereso (I feel interested)

2. Me siento orgulloso/a (I feel proud)

3. Me emociono (I feel excited)

4. Me siento feliz (I feel happy)

5. Me divierto (I feel amused)

6. Escucho con atención (I listen very carefully)

7. Presto atención a las cosas que debo recordar (I pay attention to the things I am supposed to remember)

8. Termino mis tareas (I complete my assignments)

9. Realmente me involucro en las tareas de clase (I get really involved in class activities)

10. Pienso nuevas preguntas cuando hago las tareas de clase (I form new questions in my mind as I join in class activities)

11. Aprendí de mis compañeros/as durante la actividad (I learned from my peers during the activity).

12. No quiero dejar de trabajar cuando termina la clase (I do not want to stop working at the end of the class)

13. Trabajo con otros estudiantes y aprendemos los unos de los otros (I work with other students and we learn from each other)

14. Si no entiendo algo, reviso lo anterior (I go back over things if I do not understand)

15. Si me equivoco, trato de averiguar donde me he equivocado (If I make a mistake, I try to figure out where I went wrong)

16. Me hago preguntas para asegurarme que mis tareas tienen sentido (I ask myself some questions as I go along to make sure the work makes sense to me)

17. Me pienso mucho mis respuestas en los cuestionarios/actividades en esta clase (I think deeply when I take quizzes in this class)

18. Busco información de diferentes fuentes y pienso cómo juntarla (I search for information from different places and think about how to put it together)

19. Si no estoy seguro/a de algo, revisó el libro o los materiales (If I am not sure about things, I check my book or use other materials like charts)

20. Trato de hacer los ejercicios difíciles por mi cuenta (I try to figure out the hard parts on my own)

21. Pienso en la calidad de mis ideas o trabajo durante las actividades de clase (I judge the quality of my ideas or work during class activities)

22. Paso de todo, realmente no estoy pensando o haciendo nada en clase (I am “zoned out”, not really thinking or doing class work)

23. Dejo a mi mente divagar (Me pongo a pensar en otras cosas) (I let my mind wander)

24. Solo finjo que estoy trabajando (I just pretend like I’m working)
